# Supplementary material for: Hydroethanolic Extract of Prunus domestica L.: Metabolite Profiling and In Vitro Modulation of Molecular Mechanisms Associated to Cardiometabolic Diseases
Source: MDPI journal article supplement (doi:10.3390/nu14020340), 2022-01-14
Supplement: s1 [file s1]

**Table S1.** Sugars and organic acids identified in the 600.17 MHz  $^1\text{H}$  spectra of *P. domestica* fruit pulp extracts. Asterisks indicate signals selected for integration.

| Compound      | Assignment             | $^1\text{H}$ (ppm) | Multiplicity [J(Hz)] | $^{13}\text{C}$ (ppm) |
|---------------|------------------------|--------------------|----------------------|-----------------------|
| Sugars        |                        |                    |                      |                       |
| D-Glucose     | CH-1                   | 5.25*              | d [3.6]              | 93.1                  |
|               | CH-2                   | 3.55               |                      | 72.0                  |
|               | CH-3                   | 3.72               |                      | 73.4                  |
|               | CH-4                   | 3.43               |                      | 70.6                  |
|               | CH-5                   | 3.84               |                      |                       |
|               | CH <sub>2</sub> -6,6'  | 3.89; 3.75         |                      | 61.7                  |
| D-Glucose     | CH-1                   | 4.66*              | d [8.1]              | 97.0                  |
|               | CH-2                   | 3.25               |                      | 75.1                  |
|               | CH-3                   | 3.49               |                      | 76.8                  |
|               | CH-4                   | 3.43               |                      | 70.4                  |
|               | CH-5                   | 3.49               |                      | 76.9                  |
|               | CH <sub>2</sub> -6,6'  | 3.90; 3.81         |                      | 61.7                  |
| Sucrose       | CH-1 (Glucose)         | 5.42*              | d [3.8]              | 93.1                  |
|               | CH-2                   | 3.58               |                      | 72.0                  |
|               | CH-3                   | 3.78               |                      | 73.4                  |
|               | CH-4                   | 3.49               |                      | 70.2                  |
|               | CH-3' (Fructose)       | 4.23               | d [8.8]              | 77.5                  |
|               | CH-4'                  | 4.06               |                      | 75.0                  |
|               | CH-5'                  | 3.90               |                      | 82.5                  |
| D-Xylose      | CH-1                   | 5.20*              | d [3.6]              |                       |
|               | CH-2                   | 3.52               |                      |                       |
| D-Xylose      | CH-1                   | 4.59*              | d [7.9]              |                       |
| Organic acids |                        |                    |                      |                       |
| Citric acid   | $\alpha,\gamma$ -CH    | 2.54*              | d [15.3]             | 46.7                  |
|               | $\alpha',\gamma'$ -CH  | 2.70               |                      | 46.7                  |
|               | $\beta$ -C             |                    |                      | 76.4                  |
|               | 1,5-COOH               |                    |                      | 180.1                 |
|               | 6-COOH                 |                    |                      | 182.8                 |
| Malic acid    | $\alpha$ -CH           | 4.30*              | dd [10.0; 3.3]       | 71.4                  |
|               | $\beta$ -CH            | 2.67               | dd [15.5; 3.3]       | 43.7                  |
|               | $\beta'$ -CH           | 2.39               | dd [15.3; 10.0]      | 43.7                  |
| Quinic acid   | C-1                    |                    |                      | 78.1                  |
|               | CH <sub>2</sub> -2, 2' | 1.88*; 2.07        | dd [13.3; 11.0]; m   | 41.9                  |
|               | CH-3                   | 4.01               | m                    | 67.9                  |
|               | CH-4                   |                    |                      | 76.2                  |
